# Supplementary material for: iDS372, a Phenotypically Reconciled Model for the Metabolism of Streptococcus pneumoniae Strain R6
Source: Front Microbiol. 2019 Jun 25;10:1283. doi: 10.3389/fmicb.2019.01283 (PMC6603136; doi:10.3389/fmicb.2019.01283)
Supplement: Supplementary file 3 [file Table_1.xls]

## Sheet: Summary
			Supplemental material.
	Table		Description
	Table S1		Online databases used throughout this work.
	Table S2		List of examples of re-annotation and confidence level assignment of S. pneumoniae R6 re-construction network . Bold lines indicate the gene annotation included in the model. N/A – non-applicable. For information regarding databases see Table S1.
	Table S3		Annotation of the genes present in S. pneumoniae R6 iDS372 model
	Table S4		List of genes assigned with transport functions and corresponding family numbers
	Table S5		Biomass composition in mmol of molecules per gram of biomass. Molecular wheight in green background cells were caculated using the fatty-acyl coa as R group in lipids. Amino acids molecular weight does not include a water molecule. Nucleotides molecular weight does not includea diphosphate molecule.
	Table S6		Cell wall composition.
	Table S7		Lipoteichoic acid composition.
	Table S8		Average fatty acyl composition.
	Table S9		Average lipid composition.
	Table S10		Reactions included in iDS385 model, including Gene-Protein-Reaction associations.
	Table S11		Media used to perform simulations.
	Table S12		Results of amino acid essentiality study.
	Table S13		Assessment of the maintenance ATP flux that better fits the experimental data, regarding growth in glucose. Aerobic simulations were performed with choline excess.
	Table S14		Growth and by product analysis with the iDS385 model for the four different carbon sources tested (glucose, galactose, N-acetyl-D-glucosamine and mannose) , shifting the pflexpression from 0 to 100%
	Table S15		Analysis of essential genes predicted by Optflux and OGEE using the anaerobic experimental conditions from Carvalho et al (2013).

## Sheet: Table S1
	Name	Information retrieved	Web	Reference
	National Center for Biotechnology Information (NCBI )	Genome sequence (merlin)	www.ncbi.nlm.nih.gov	(Wheeler et al., 2007)
	Universal Protein Resource Knowledgebase (UniProtKB)	Curated and non-curated protein information	www.uniprot.org	(Consortium, 2010)
	BRENDA	Enzyme functional information – Re-annotation pipeline	www.brenda-enzymes.info	(Placzek et al., 2017)
	Kyoto Encyclopaedia of Genes and Genomes (KEGG)	Load of KEGG reactions, pathway analysis	http://www.genome.jp/kegg	(Kanehisa et al., 2004)
	Online Gene Essentiality Database (OGEE)	Essential gene data used in Qualitative model validation	http://ogeedb.embl.de	(Chen et al., 2012)
	Biocyc	Genome and pathway description for network curation	http://biocyc.org	(Karp et al., 2005)
	Conserved Domain Database (CDD)	Analysis of conserved domains	http://www.ncbi.nlm.nih.gov/Structure/cdd/	(Marchler-Bauer et al., 2013)

## Sheet: Table S2
	Locus tag	Initial condition	Database	EC number	Function	Comments	Label
	Spr0009	Complete EC number	KEGG	N/A	Hypothetical protein	merlin agrees with BRENDA	Label C
			UniProt	N/A	Hypothetical protein
			CDD	N/A	Beta-lactamase family
			merlin	3.5.2.6	Beta-lactamase
			Brenda	3.5.2.6	Beta-lactamase
	Spr0021	Complete and reviewed	KEGG	6.3.4.4	adenylosuccinate synthetase	merlin agrees with BRENDA, UniProt and KEGG	Label A
		EC number	UniProt	6.3.4.4	adenylosuccinate synthetase
			CDD	N/A	adenylosuccinate synthetase
			merlin	6.3.4.4	adenylosuccinate synthetase
			Brenda	6.3.4.4	adenylosuccinate synthetase
	Spr0022	Incomplete EC	KEGG	3.5.4.33	tRNA(adenine34) deaminase	merlin is incomplete, yet BRENDA provides a complete EC number	Label E
		number	UniProt	N/A	Hypothetical protein
			CDD	N/A	Nucleoside deaminase
			merlin	3.5.4.-	cytidine/deoxycytidylate deaminase
			Brenda	3.5.4.5	Cytidine deaminase
	Spr0053	Complete EC	KEGG	5.4.99.18	5-(carboxyamino)imidazole ribonucleotide mutase	Merlin is complete, but BRENDA and Uniprot are in agreement	Label C
		number	UniProt	5.4.99.18	N5-carboxyaminoimidazole ribonucleotide mutase
			CDD	N/A	Sugar isomerase
			merlin	4.1.1.21	phosphoribosylaminoimidazole carboxylase
			Brenda	5.4.99.18	5-(carboxyamino)imidazole ribonucleotide mutase
	Spr0064	Incomplete EC number	KEGG	5.3.1.-	sugar isomerase domain protein AgaS	No complete homologous gene found with the same function	Label E
			UniProt	5.3.1.-	Tagatose-6-phosphate ketose/aldose isomerase
			CDD	N/A	Sugar isomerase
			merlin	5.3.1.-	Sugar isomerase domain protein AgaS
			Brenda	5.3.1.26	Tagatose-6-phosphate isomerase
	Spr0068	Incomplete EC number	KEGG	N/A	Hypothetical protein	Only 1 complete EC had an annotation score above 0.2	Label D
			UniProt	N/A	Hypothetical protein
			CDD	N/A	Phosphorylase superfamily
			merlin	2.4.2.3	Uridine phosphorylase
			Brenda	2.4.2.3	Uridine phosphorylase

## Sheet: Table S3
	Locus tag	Name	Product	EC Number(s) / TC Number(s)	Label
	spr0011	hgt	hypoxanthine phosphoribosyltransferase	2.4.2.8	Label A
	spr0021	purA	adenylosuccinate synthase	6.3.4.4	Label A
	spr0022	-	cytidine and deoxycytidylate deaminase zinc-binding region	3.5.4.5	Label E
	spr0023	dut	deoxyuridine 5'-triphosphate nucleotidohydrolase	3.6.1.23	Label B
	spr0026	-	carbonic anhydrase	4.2.1.1	Label D
	spr0028	prsA	ribose-phosphate pyrophosphokinase	2.7.6.1	Label A
	spr0035	aspC	aromatic amino acid aminotransferase	2.6.1.1	Label B
	spr0039	-	NAD(P)H-dependent glycerol-3-phosphate dehydrogenase	1.1.1.94	Label D
	spr0041	-	tagatose 1,6-diphosphate aldolase	4.1.2.40	Label D
	spr0043	comA	putative ABC transporter, ATP-binding protein ComA	3.A.1.106.#_AND_3.A.1.110.#_AND_3.A.1.112.#_AND_3.A.1.117.#_AND_3.A.1.12.#_AND_3.A.1.135.#	Label A
	spr0045	purC	phosphoribosylaminoimidazole-succinocarboxamide synthase	6.3.2.6	Label A
	spr0046	purL	phosphoribosylformylglycinamidine synthase	6.3.5.3	Label B
	spr0047	purF	amidophosphoribosyltransferase	2.4.2.14	Label B
	spr0048	purM	phosphoribosylformylglycinamidine cyclo-ligase	6.3.3.1	Label A
	spr0049	purN	phosphoribosylglycinamide formyltransferase	2.1.2.2	Label B
	spr0051	purH	phosphoribosylaminoimidazolecarboxamide formyltransferase/IMP cyclohydrolase	2.1.2.3, 3.5.4.10	Label A
	spr0052	purD	phosphoribosylamine--glycine ligase	6.3.4.13	Label A
	spr0053	purE	phosphoribosylaminoimidazole carboxylase, catalytic subunit	5.4.99.18	Label C
	spr0056	purB	adenylosuccinate lyase	4.3.2.2	Label B
	spr0059	bgaC	beta-galactosidase	3.2.1.23	Label B
	spr0060	PTS-EIIB	PTS system sorbose subfamily IIB component	2.7.1.69	Label D
	spr0061	PTS-EIIC	PTS system, IIC component	2.7.1.69,4.A.2.1.#_AND_4.A.6.1.#	Label D
	spr0062	PTS-EIID	PTS system mannose/fructose/sorbose family IID component	2.7.1.69,4.A.2.1.#_AND_4.A.6.1.#	Label D
	spr0065	galM	aldose 1-epimerase	5.1.3.3	Label B
	spr0068	-	uridine phosphorylase	2.4.2.3	Label F
	spr0071	trkA	Trk system potassium uptake protein TrkA, N-terminal domain protein	1.4.1.9	Label F
	spr0094	sdaA	L-serine dehydratase, iron-sulfur-dependent, alpha subunit	4.3.1.17	Label B
	spr0095	sdaB	L-serine dehydratase, iron-sulfur-dependent, beta subunit	4.3.1.17	Label B
	spr0102	argG	argininosuccinate synthase	6.3.4.5	Label A
	spr0103	argH	argininosuccinate lyase	4.3.2.1	Label A
	spr0106	Transporter	ABC-type bacteriocin transporter family protein	3.A.1.106.#_AND_3.A.1.110.#_AND_3.A.1.112.#_AND_3.A.1.117.#_AND_3.A.1.12.#_AND_3.A.1.135.#	Label D
	spr0137	ABC-NP	ABC transporter, ATP-binding protein	3.6.3.44,3.A.1.106.#_AND_3.A.1.110.#_AND_3.A.1.112.#_AND_3.A.1.117.#_AND_3.A.1.12.#_AND_3.A.1.135.#	Label C
	spr0148	dapE	peptidase dimerization domain protein	3.5.1.18	Label B
	spr0161	ribH	6,7-dimethyl-8-ribityllumazine synthase	2.5.1.78	Label A
	spr0162	ribA	3,4-dihydroxy-2-butanone 4-phosphate synthase	3.5.4.25	Label B
	spr0163	ribC	riboflavin synthase subunit alpha	2.5.1.9	Label B
	spr0164	ribD	riboflavin biosynthesis protein RibD	3.5.4.26, 1.1.1.193	Label B
	spr0178	folC	dihydrofolate:folylpolyglutamate synthetase	6.3.2.12	Label B
	spr0183	nrdD	anaerobic ribonucleoside-triphosphate reductase	1.17.4.2	Label B
	spr0210	adk	adenylate kinase	2.7.4.3	Label A
	spr0218	-	glycerol-3-phosphate dehydrogenase	1.1.1.94	Label C
	spr0219	gpmB	phosphoglycerate mutase family protein	5.4.2.1	Label B
	spr0231	PTS-EIIC	PTS system, lactose/cellobiose IIC component family protein	2.7.1.69,4.A.3.1.#_AND_4.A.3.2.#	Label C
	spr0232	pflF	pyruvate formate-lyase	2.3.1.54	Label B
	spr0233	talC	fructose-6-phosphate aldolase	2.2.1.2	Label B
	spr0234	gldA	glycerol dehydrogenase	1.1.1.6	Label B
	spr0240	uppS	di-trans,poly-cis-decaprenylcistransferase	2.5.1.31	Label C
	spr0241	cdsA	phosphatidate cytidylyltransferase	2.7.7.41	Label B
	spr0244	bglA	6-phospho-beta-glucosidase	3.2.1.21	Label B
	spr0245	glmS	glutamine-fructose-6-phosphate transaminase (isomerizing)	2.6.1.16	Label A
	spr0259	manN	PTS system, mannose/fructose/sorbose family, IID component	2.7.1.69,4.A.2.1.#_AND_4.A.6.1.#	Label B
	spr0260	manM	PTS system mannose-specific transporter subunit IIC	2.7.1.69,4.A.2.1.#_AND_4.A.6.1.#	Label B
	spr0261	manL	PTS system mannose-specific EIIAB component	2.7.1.69	Label B
	spr0262	adhP	alcohol dehydrogenase	1.1.1.1	Label B
	spr0266	sulA	dihydropteroate synthase	2.5.1.15	Label A
	spr0268	folE	GTP cyclohydrolase I	3.5.4.16	Label A
	spr0269	sulD	bifunctional folate synthesis protein	4.1.2.25, 2.7.6.3	Label A
	spr0276	celA	6-phospho-beta-glucosidase	3.2.1.86	Label B
	spr0280	celC	cellobiose phosphotransferase system IIA component	2.7.1.69	Label B
	spr0282	celD	cellobiose phosphotransferase system IIC component	2.7.1.69,4.A.3.1.#_AND_4.A.3.2.#	Label B
	spr0287	kdgA	keto-hydroxyglutarate-aldolase/keto-deoxy- phosphogluconate aldolase	4.1.2.14, 4.1.3.16	Label C
	spr0294	PTS-EII	PTS system transporter subunit IIC	2.7.1.69,4.A.2.1.#_AND_4.A.6.1.#	Label C
	spr0295	PTS-EII	PTS system, IID component	2.7.1.69,4.A.2.1.#_AND_4.A.6.1.#	Label C
	spr0305	mraY	phospho-N-acetylmuramoyl-pentapeptide- transferase	2.7.8.13	Label A
	spr0329	pbpA	penicillin-binding protein 1A	2.4.1.129	Label F
	spr0335	gnd	6-phosphogluconate dehydrogenase	1.1.1.44	Label B
	spr0338	mvk	mevalonate kinase	2.7.1.36	Label C
	spr0339	mvd1	diphosphomevalonate decarboxylase	4.1.1.33	Label B
	spr0340	mvaK2	phosphomevalonate kinase	2.7.4.2	Label C
	spr0341	fni	isopentenyl-diphosphate delta-isomerase, type 2	5.3.3.2	Label A
	spr0356	mtlA	PTS system, mannitol-specific IIC component family protein	2.7.1.69	Label A
	spr0358	mtlF	mannitol-specific phosphotransferase enzyme IIA component	2.7.1.69	Label B
	spr0359	mtlD	mannitol-1-phosphate 5-dehydrogenase	1.1.1.17	Label A
	spr0370	mip	Haloalkane dehalogenase	3.8.1.5	Label D
	spr0374	lysC	aspartate kinase	2.7.2.4	Label B
	spr0377	fabH	3-oxoacyl-(acyl carrier protein) synthase III	2.3.1.180	Label A
	spr0379	fabK	putative enoyl-[acyl-carrier-protein] reductase II	1.3.1.9	Label C
	spr0380	fabD	malonyl CoA-acyl carrier protein transacylase	2.3.1.39	Label B
	spr0381	fabG	3-oxoacyl-[acyl-carrier-protein] reductase	1.1.1.100	Label B
	spr0382	fabF	beta-ketoacyl-acyl-carrier-protein synthase II	2.3.1.179	Label B
	spr0383	accB	acetyl-CoA carboxylase, biotin carboxyl carrier protein	6.4.1.2	Label B
	spr0384	fabZ	beta-hydroxyacyl-(acyl-carrier-protein) dehydratase FabZ	4.2.1.59	Label E
	spr0385	accC	acetyl-CoA carboxylase, biotin carboxylase subunit	6.3.4.14	Label B
	spr0386	accD	acetyl-CoA carboxylase, carboxyl transferase, beta subunit	6.4.1.2	Label A
	spr0387	accA	acetyl-CoA carboxylase, carboxyl transferase, alpha subunit	6.4.1.2	Label A
	spr0401	ilvB	acetolactate synthase, large subunit, biosynthetic type	2.2.1.6	Label B
	spr0402	ilvH	acetolactate synthase 3 regulatory subunit	2.2.1.6	Label B
	spr0403	ilvC	ketol-acid reductoisomerase	1.1.1.86	Label A
	spr0404	-	threonine dehydratase	4.3.1.19	Label C
	spr0406	ilvA	threonine dehydratase	4.3.1.19	Label C
	spr0410	-	threonine dehydratase	4.3.1.19	Label C
	spr0413	uppP	undecaprenyl pyrophosphate phosphatase	3.6.1.27	Label A
	spr0415	pfl	formate acetyltransferase	2.3.1.54	Label B
	spr0421	PTS-EII	PTS system, lactose/cellobiose IIC component family protein	2.7.1.69,4.A.3.1.#_AND_4.A.3.2.#	Label C
	spr0423	PTS-EII	lactose-specific phosphotransferase enzyme IIA component	2.7.1.69	Label C
	spr0424	lacG	6-phospho-beta-galactosidase	3.2.1.85	Label A
	spr0425	PTS-EII	PTS system lactose-specific EIICB component	2.7.1.69,4.A.3.1.#_AND_4.A.3.2.#	Label B
	spr0434	-	PAP2 family protein	3.1.3.4	Label C
	spr0438	pyrG	CTP synthase	6.3.4.2	Label A
	spr0441	pgk	phosphoglycerate kinase	2.7.2.3	Label A
	spr0444	glnA	glutamine synthetase, type I	6.3.1.2	Label B
	spr0468	-	putative ABC transporter, ATP-binding protein ComA	3.A.1.106.#_AND_3.A.1.110.#_AND_3.A.1.112.#_AND_3.A.1.117.#_AND_3.A.1.12.#_AND_3.A.1.135.#	Label D
	spr0505	PTS-EII	PTS system, beta-glucoside-specific IIABC component family protein	2.7.1.69,4.A.1.2.#	Label C
	spr0506	bglH	6-phospho-beta-glucosidase	3.2.1.86	Label B
	spr0510	-	5-methyltetrahydropteroyltriglutamate-- homocysteine methyltransferase	2.1.1.14	Label D
	spr0514	metE	5-methyltetrahydropteroyltriglutamate-- homocysteine S-methyltransferase	2.1.1.14	Label A
	spr0515	metF	5,10-methylenetetrahydrofolate reductase	1.5.1.20	Label B
	spr0517	cysE	serine O-acetyltransferase	2.3.1.30	Label B
	spr0530	fba	fructose-bisphosphate aldolase	4.1.2.13	Label A
	spr0546	nrd	nitroreductase	1.6.99.3	Label D
	spr0562	PTS-EII	phosphoenolpyruvate-dependent sugar phosphotransferase system, EIIA 2 family protein	2.7.1.69	Label C
	spr0563	-	PTS system, galactose-specific IIB component	2.7.1.69	Label C
	spr0564	PTS-EII	PTS system Galactitol-specific IIC component family protein	2.7.1.69	Label C
	spr0565	bgaA	LPXTG-motif cell wall anchor domain protein	3.2.1.23	Label B
	spr0582	pabB	aminodeoxychorismate synthase, component I	4.1.3.38, 2.6.1.85	Label D
	spr0584	glcK	glucokinase	2.7.1.2	Label B
	spr0585	thyA	thymidylate synthase	2.1.1.45	Label A
	spr0603	murD	UDP-N-acetylmuramoylalanine--D-glutamate ligase	6.3.2.9	Label A
	spr0604	murG	glycosyltransferase family 28 N-terminal domain protein	2.4.1.227	Label A
	spr0613	pyrF	orotidine 5'-phosphate decarboxylase	4.1.1.23	Label A
	spr0614	pyrE	orotate phosphoribosyltransferase	2.4.2.10	Label A
	spr0628	-	thiaminase family protein	3.5.99.2	Label D
	spr0630	thiE	thiamine-phosphate pyrophosphorylase	2.5.1.3	Label A
	spr0634	tenA	thiaminase	3.5.99.2	Label D
	spr0636	thiM	hydroxyethylthiazole kinase	2.7.1.50	Label A
	spr0638	thiD	phosphomethylpyrimidine kinase	2.7.4.7	Label B
	spr0642	spxB	pyruvate oxidase	1.2.3.3	Label B
	spr0647	pmi	mannose-6-phosphate isomerase, class I	5.3.1.8	Label B
	spr0654	comEB	cytidine and deoxycytidylate deaminase	3.5.4.5	Label B
	spr0655	upp	uracil phosphoribosyltransferase	2.4.2.9	Label A
	spr0668	ptsG	PTS system, glucose subfamily, IIA component domain protein	2.7.1.69	Label C
	spr0671	metK	methionine adenosyltransferase	2.5.1.6	Label A
	spr0674	sodA	superoxide dismutase	1.15.1.1	Label A
	spr0691	bioY	biotin synthase	2.8.1.6	Label B
	spr0701	fabG	short chain dehydrogenase family protein	1.1.1.100	Label B
	spr0710	-	3-ketoacyl-(acyl-carrier-protein) reductase	1.1.1.100	Label D
	spr0729	folD	bifunctional 5,10-methylene-tetrahydrofolate dehydrogenase/ 5,10-methylene-tetrahydrofolate cyclohydrolase	1.5.1.5, 3.5.4.9	Label A
	spr0731	rpiA	ribose 5-phosphate isomerase A	5.3.1.6	Label A
	spr0732	deoB	phosphopentomutase	5.4.2.7	Label A
	spr0734	pnp	purine nucleoside phosphorylase I, inosine and guanosine-specific	2.4.2.1	Label B
	spr0738	deoD	purine nucleoside phosphorylase	2.4.2.1	Label B
	spr0741	coaA	pantothenate kinase	2.7.1.33	Label A
	spr0745	deoC	deoxyribose-phosphate aldolase	4.1.2.4	Label A
	spr0746	cdd	cytidine deaminase	3.5.4.5	Label B
	spr0749	ABC-MSP	branched-chain amino acid ABC transporter, permease protein	-	Label D
	spr0758	ilvE	branched-chain-amino-acid transaminase	2.6.1.42	Label B
	spr0779	fruB	1-phosphofructokinase	2.7.1.56	Label B
	spr0780	fruA	PTS system, fructose subfamily, IIA component domain protein	2.7.1.69,4.A.2.1.#_AND_4.A.6.1.#	Label B
	spr0783	-	aminotransferase, class V	2.8.1.7	Label D
	spr0789	-	carbamoylphosphate synthase large subunit	6.3.5.5	Label C
	spr0796	pfkA	6-phosphofructokinase	2.7.1.11	Label A
	spr0797	pykF	pyruvate kinase	2.7.1.40	Label B
	spr0819	speE	spermidine synthase	2.5.1.16	Label A
	spr0822	-	agmatine deiminase	3.5.3.12	Label A
	spr0832	proB	glutamate 5-kinase	2.7.2.11	Label A
	spr0833	proA	glutamate-5-semialdehyde dehydrogenase	1.2.1.41	Label A
	spr0834	proC	pyrroline-5-carboxylate reductase	1.5.1.2	Label B
	spr0835	tmk	thymidylate kinase	2.7.4.9	Label A
	spr0845	pyrH	UMP kinase	2.7.4.22	Label A
	spr0852	ald-truncation	alanine dehydrogenase	1.4.1.1	Label B
	spr0853	ald-truncation	alanine dehydrogenase	1.4.1.1	Label B
	spr0854	ald-truncation	alanine dehydrogenase	1.4.1.1	Label B
	spr0866	pyrD	dihydroorotate dehydrogenase 1B	1.3.1.14	Label C
	spr0870	dgkA	diacylglycerol kinase	2.7.1.107	Label B
	spr0873	coaE	dephospho-CoA kinase	2.7.1.24	Label A
	spr0875	pmrA	multi-drug resistance efflux pump	-	Label D
	spr0887	gpmB	phosphoglycerate mutase	5.4.2.1	Label B
	spr0891	glmU	UDP-N-acetylglucosamine diphosphorylase/glucosamine-1-phosphate N-acetyltransferase	2.3.1.157, 2.7.7.23	Label A
	spr0918	asd	aspartate-semialdehyde dehydrogenase	1.2.1.11	Label B
	spr0922	tdk	thymidine kinase	2.7.1.21	Label A
	spr0928	glyA	glycine hydroxymethyltransferase	2.1.2.1	Label A
	spr0974	ppc	phosphoenolpyruvate carboxylase	4.1.1.31	Label A
	spr0976	ABC-MSP	branched-chain amino acid ABC transporter, permease protein	3.6.3.17,3.A.1.2.#_AND_3.A.1.4.#	Label C
	spr0982	-	glycosyl transferase, group 1	2.4.1.157	Label F
	spr0989	murZ	UDP-N-acetylglucosamine 1-carboxyvinyltransferase	2.5.1.7	Label A
	spr1002	prs	ribose-phosphate pyrophosphokinase	2.7.6.1	Label A
	spr1004	-	RelA/SpoT domain protein	2.7.6.5	Label C
	spr1005	ppnK	inorganic polyphosphate/ATP-NAD kinase	2.7.1.23	Label A
	spr1007	eutD	phosphate acetyltransferase	2.3.1.8	Label B
	spr1017	mreA	bifunctional riboflavin kinase/FMN adenylyltransferase	2.7.7.2, 2.7.1.26	Label C
	spr1023	ABC-MSP	transporter, major facilitator family protein	-	Label D
	spr1028	gapN	NADP-dependent glyceraldehyde-3-phosphate dehydrogenase	1.2.1.9	Label B
	spr1029	glgB	1,4-alpha-glucan branching enzyme	2.4.1.18	Label A
	spr1031	glgD	glucose-1-phosphate adenylyltransferase, GlgD subunit	2.7.7.27	Label C
	spr1032	glgA	glycogen synthase	2.4.1.21	Label A
	spr1034	glxK	glycerate kinase	2.7.1.31	Label C
	spr1036	eno	phosphopyruvate hydratase	4.2.1.11	Label A
	spr1047	lplA	lipoate-protein ligase	2.7.7.63	Label D
	spr1048	acoL	dihydrolipoyl dehydrogenase	1.8.1.4	Label B
	spr1049	acoC	dihydrolipoamide acetyltransferase	2.3.1.12	Label B
	spr1053	pyrC	dihydroorotase	3.5.2.3	Label A
	spr1057	-	HAD hydrolase, TIGR02254 family	3.1.3.5	Label F
	spr1064	nrdH	glutaredoxin-like protein NrdH	1.17.4.1	Label B
	spr1065	nrdE	ribonucleoside-diphosphate reductase, alpha subunit	1.17.4.1	Label B
	spr1066	nrdF	ribonucleotide-diphosphate reductase subunit beta	1.17.4.1	Label B
	spr1069	lacG	6-phospho-beta-galactosidase	3.2.1.85	Label A
	spr1070	lacE	PTS system, lactose-specific IIC component	2.7.1.69,4.A.3.1.#_AND_4.A.3.2.#	Label B
	spr1071	lacF	lactose-specific phosphotransferase enzyme IIA component	2.7.1.69	Label C
	spr1073	lacD	tagatose-bisphosphate aldolase	4.1.2.40	Label A
	spr1074	lacC	tagatose-6-phosphate kinase	2.7.1.144	Label A
	spr1075	lacB	galactose-6-phosphate isomerase, LacB subunit	5.3.1.26	Label A
	spr1076	lacA	galactose-6-phosphate isomerase subunit LacA	5.3.1.26	Label A
	spr1080	-	PTS system, galactose-specific IIB component	2.7.1.69	Label C
	spr1081	-	phosphoenolpyruvate-dependent sugar phosphotransferase system, EIIA 2 family protein	2.7.1.69	Label C
	spr1087	ispA	geranyltranstransferase	2.5.1.10	Label B
	spr1090	udK	uridine kinase	2.7.1.48	Label A
	spr1095	metY-truncation	O-acetylhomoserine sulfhydrylase	2.5.1.49	Label B
	spr1100	ldh	L-lactate dehydrogenase	1.1.1.27	Label A
	spr1109	fhs	formate--tetrahydrofolate ligase	6.3.4.3	Label A
	spr1110	dfp-C-terminus	phosphopantothenate--cysteine ligase	6.3.2.5	Label C
	spr1111	dfp-N-terminus	phosphopantothenoylcysteine decarboxylase	4.1.1.36	Label C
	spr1112	-	membrane protein	-	Label D
	spr1122	zwf	glucose-6-phosphate dehydrogenase	1.1.1.49	Label B
	spr1128	guaC	GMP reductase	1.7.1.7	Label A
	spr1133	leuD-truncation	3-isopropylmalate dehydratase small subunit	4.2.1.33	Label B
	spr1135	leuB	3-isopropylmalate dehydrogenase	1.1.1.85	Label A
	spr1136	leuA-truncation	2-isopropylmalate synthase	2.3.3.13	Label B
	spr1140	-	3-isopropylmalate dehydrogenase	1.1.1.85	Label D
	spr1145	licC	licC protein	2.7.7.15	Label F
	spr1147	pck	choline kinase	2.7.1.32	Label D
	spr1153	carB	carbamoyl-phosphate synthase, large subunit	6.3.5.5	Label A
	spr1154	carA	carbamoyl-phosphate synthase, small subunit	6.3.5.5	Label A
	spr1156	pyrR	pyrimidine operon regulatory protein/uracil phosphoribosyltransferase PyrR	2.4.2.9	Label A
	spr1169	-	dGTP triphosphohydrolase	3.1.5.1	Label F
	spr1174	-	chorismate mutase	5.4.99.5	Label C
	spr1186	npl-truncation	N-acetylneuraminate lyase	4.1.3.3	Label B
	spr1188	cdd	cytidine deaminase	3.5.4.5	Label B
	spr1189	-	phosphatidylglycerophosphatase A	3.1.3.27	Label F
	spr1196	nanE	N-acetylmannosamine-6-phosphate 2-epimerase	5.1.3.9	Label A
	spr1203	ABC-NP	ABC transporter family protein	3.A.1.106.#_AND_3.A.1.110.#_AND_3.A.1.112.#_AND_3.A.1.117.#_AND_3.A.1.12.#_AND_3.A.1.135.#	Label D
	spr1215	ABC-N/P	ABC transporter transmembrane region family protein	3.6.3.44,3.A.1.106.#_AND_3.A.1.110.#_AND_3.A.1.112.#_AND_3.A.1.117.#_AND_3.A.1.12.#_AND_3.A.1.135.#	Label C
	spr1218	thrB	homoserine kinase	2.7.1.39	Label A
	spr1219	hom	homoserine dehydrogenase	1.1.1.3	Label B
	spr1227	pheA	prephenate dehydratase	4.2.1.51	Label B
	spr1228	aroK	shikimate kinase	2.7.1.71	Label B
	spr1229	aroA	3-phosphoshikimate 1-carboxyvinyltransferase	2.5.1.19	Label A
	spr1231	tyrA	prephenate dehydrogenase	1.3.1.12	Label B
	spr1232	aroC	chorismate synthase	4.2.3.5	Label A
	spr1233	aroB	3-dehydroquinate synthase	4.2.3.4	Label A
	spr1234	aroE	shikimate 5-dehydrogenase	1.1.1.25	Label A
	spr1235	aroD	3-dehydroquinate dehydratase	4.2.1.10	Label A
	spr1247	murB	UDP-N-acetylenolpyruvoylglucosamine reductase	1.1.1.158	Label A
	spr1249	aldB	alpha-acetolactate decarboxylase	4.1.1.5	Label B
	spr1265	-	acyl-ACP thioesterase	3.1.2.14	Label F
	spr1272	nagB	glucosamine-6-phosphate deaminase	3.5.99.6	Label A
	spr1276	nadE	NAD+ synthetase	6.3.1.5	Label A
	spr1277	-	nicotinate phosphoribosyltransferase	2.4.2.11	Label B
	spr1289	ABC-N/P	ABC transporter ATP-binding protein/permease	3.A.1.106.#_AND_3.A.1.110.#_AND_3.A.1.112.#_AND_3.A.1.117.#_AND_3.A.1.12.#_AND_3.A.1.135.#	Label D
	spr1290	ABC-N/P	ABC transporter, ATP-binding protein	3.6.3.42,3.A.1.106.#_AND_3.A.1.110.#_AND_3.A.1.112.#_AND_3.A.1.117.#_AND_3.A.1.12.#_AND_3.A.1.135.#	Label C
	spr1300	guaA	GMP synthase	6.3.5.2	Label A
	spr1312	trxB	thioredoxin-disulfide reductase	1.8.1.9	Label B
	spr1321	-	pyridoxal 5'-phosphate synthase, glutaminase subunit Pdx2	-	Label G
	spr1322	pdx1	pyridoxal 5'-phosphate synthase, synthase subunit Pdx1	-	Label G
	spr1323	nox	NADH oxidase	1.6.99.3	Label C
	spr1351	pgm	phosphoglucomutase	5.4.2.2	Label C
	spr1358	-	6-phosphogluconolactonase	3.1.1.31	Label D
	spr1359	atpC	ATP synthase F1, epsilon subunit	3.6.3.14,3.A.2.1.#_AND_3.B.1.1.#	Label C
	spr1360	atpD	ATP synthase F1, beta subunit	3.6.3.14,3.A.2.1.#_AND_3.B.1.1.#	Label A
	spr1361	atpG	ATP synthase F1, gamma subunit	3.6.3.14,3.A.2.1.#_AND_3.B.1.1.#	Label C
	spr1362	atpA	ATP synthase F1, alpha subunit	3.6.3.14,3.A.2.1.#_AND_3.B.1.1.#	Label A
	spr1363	atpH	ATP synthase F1, delta subunit	3.6.3.14,3.A.2.1.#_AND_3.B.1.1.#	Label C
	spr1364	atpF	ATP synthase F0, B subunit	3.6.3.14,3.A.2.1.#_AND_3.B.1.1.#	Label C
	spr1365	atpB	ATP synthase F0, A subunit	3.6.3.14,3.A.2.1.#_AND_3.B.1.1.#	Label C
	spr1366	atpE	F0F1 H+ ATPase subunit C	3.6.3.14,3.A.2.1.#_AND_3.A.2.2.#_AND_3.B.1.1.#_AND_3.D.4.4.#	Label C
	spr1373	murC	UDP-N-acetylmuramate--L-alanine ligase	6.3.2.8	Label A
	spr1376	patB	cystathionine beta-lyase patB	4.4.1.8	Label D
	spr1377	metB	cystathionine gamma-synthase	2.5.1.48	Label B
	spr1384	murE	UDP-N-acetylmuramoyl-L-alanyl-D-glutamate--L- lysine ligase	6.3.2.7,6.3.2.13	Label D
	spr1389	ppaC	manganese-dependent inorganic pyrophosphatase	3.6.1.1	Label A
	spr1399	aspB	aspartate aminotransferase	2.6.1.1	Label B
	spr1404	-	M trans-acting positive regulator (MGA) PRD domain protein	2.6.1.1	Label D
	spr1414	dapB	dihydrodipicolinate reductase	1.17.1.8	Label B
	spr1417	glmM	phosphoglucosamine mutase	5.4.2.10	Label A
	spr1429	dfr	dihydrofolate reductase	1.5.1.3	Label B
	spr1432	tpiA	triose-phosphate isomerase	5.3.1.1	Label A
	spr1434	metA	homoserine O-succinyltransferase	2.3.1.46	Label A
	spr1435	apt	adenine phosphoribosyltransferase	2.4.2.7	Label A
	spr1450	pdxK	pyridoxine kinase	2.7.1.35	Label C
	spr1453	MFS_transporter	transporter, major facilitator family protein	-	Label D
	spr1456	cmk	cytidylate kinase	2.7.4.25	Label A
	spr1460	galE	UDP-glucose 4-epimerase	5.1.3.2	Label B
	spr1461	-	glycine oxidase	1.4.3.19	Label F
	spr1487	relA	GTP pyrophosphokinase	2.7.6.5	Label B
	spr1495	tpx	thiol peroxidase	1.11.1.15	Label C
	spr1499	gpmA	phosphoglyceromutase	5.4.2.1	Label A
	spr1514	murF	UDP-N-acetylmuramoyl-tripeptide--D-alanyl-D- alanine ligase	6.3.2.10	Label B
	spr1515	ddl	D-alanine--D-alanine ligase	6.3.2.4	Label A
	spr1519	glk	ROK family protein	2.7.1.60	Label D
	spr1520	npl-truncation	N-acetylneuraminate lyase	4.1.3.3	Label B
	spr1525	ABC-MSP	ABC transporter, permease protein	3.6.3.17	Label C
	spr1529	nanE	N-acetylmannosamine-6-phosphate 2-epimerase	5.1.3.9	Label A
	spr1540	alr	alanine racemase	5.1.1.1	Label A
	spr1541	acpS	holo-[acyl-carrier-protein] synthase	2.7.8.7	Label A
	spr1542	aroF	3-deoxy-7-phosphoheptulonate synthase	2.5.1.54	Label B
	spr1543	aroG	3-deoxy-7-phosphoheptulonate synthase	2.5.1.54	Label B
	spr1565	scrK	fructokinase	2.7.1.4	Label B
	spr1566	scrA	PTS system sucrose-specific IIBC component	2.7.1.69,4.A.1.2.#	Label B
	spr1568	scrB	sucrose-6-phosphate hydrolase	3.2.1.26	Label B
	spr1570	mvaA	hydroxymethylglutaryl-CoA reductase, degradative	1.1.1.88	Label B
	spr1571	mvaS	hydroxymethylglutaryl-CoA synthase	2.3.3.10	Label C
	spr1583	gmk	guanylate kinase	2.7.4.8	Label A
	spr1592	nadD	nicotinate-nucleotide adenylyltransferase	2.7.7.18	Label A
	spr1602	trxA	thioredoxin	1.8.1.9	Label C
	spr1617	sacA	sucrose-6-phosphate hydrolase	3.2.1.26	Label B
	spr1631	trpA	tryptophan synthase, alpha subunit	4.2.1.20	Label A
	spr1632	trpB	tryptophan synthase, beta subunit	4.2.1.20	Label A
	spr1633	trpF	N-(5'-phosphoribosyl)anthranilate isomerase	5.3.1.24	Label A
	spr1634	trpC	indole-3-glycerol phosphate synthase	4.1.1.48	Label A
	spr1635	trpD	anthranilate phosphoribosyltransferase	2.4.2.18	Label A
	spr1636	trpG	anthranilate synthase component II	4.1.3.27	Label B
	spr1637	trpE	anthranilate synthase component I	4.1.3.27	Label B
	spr1647	galE	UDP-glucose 4-epimerase	5.1.3.2	Label B
	spr1648	galT	galactose-1-phosphate uridylyltransferase	2.7.7.12	Label A
	spr1656	ABC-N/P	ABC transporter transmembrane region family protein	3.6.3.44,3.A.1.106.#_AND_3.A.1.110.#_AND_3.A.1.112.#_AND_3.A.1.117.#_AND_3.A.1.12.#_AND_3.A.1.135.#	Label C
	spr1657	ABC-N/P	ABC transporter transmembrane region family protein	3.6.3.44,3.A.1.106.#_AND_3.A.1.110.#_AND_3.A.1.112.#_AND_3.A.1.117.#_AND_3.A.1.12.#_AND_3.A.1.135.#	Label C
	spr1662	xpt	xanthine phosphoribosyltransferase	2.4.2.22	Label A
	spr1663	pbuX	xanthine permease	-	Label D
	spr1667	galT	galactose-1-phosphate uridylyltransferase	2.7.7.12	Label A
	spr1668	galK	galactokinase	2.7.1.6	Label A
	spr1670	adhB	alcohol dehydrogenase	1.1.1.1	Label B
	spr1677	proWX	substrate binding domain of ABC-type glycine betaine transport system family protein	3.A.1.106.#_AND_3.A.1.110.#_AND_3.A.1.112.#_AND_3.A.1.12.#	Label D
	spr1683	galE-truncation	UDP-glucose 4-epimerase	5.1.3.2	Label B
	spr1695	-	non-canonical purine NTP pyrophosphatase RdgB	3.6.1.19	Label C
	spr1696	murI	glutamate racemase	5.1.1.3	Label A
	spr1698	dexS	alpha,alpha-phosphotrehalase	3.2.1.93	Label C
	spr1699	treP	PTS system, trehalose-specific IIBC component	2.7.1.69,4.A.1.2.#	Label B
	spr1709	gtfA	sucrose phosphorylase	2.4.1.5	Label D
	spr1713	aga	alpha-galactosidase	3.2.1.22	Label B
	spr1715	birA	biotin--[acetyl-CoA-carboxylase] ligase	6.3.4.15	Label C
	spr1732	-	PAP2 family protein		Label C
	spr1775	ndk	nucleoside diphosphate kinase	2.7.4.6	Label A
	spr1780	epuA	hypothetical protein	3.A.2.1.#_AND_3.A.2.2.#_AND_3.B.1.1.#_AND_3.D.4.4.#	Label D
	spr1781	murA	UDP-N-acetylglucosamine 1-carboxyvinyltransferase	2.5.1.7	Label A
	spr1783	coaD	pantetheine-phosphate adenylyltransferase	2.7.7.3	Label A
	spr1785	asnA	aspartate--ammonia ligase	6.3.1.1	Label A
	spr1789	acyP	acylphosphatase	3.6.1.7	Label B
	spr1792	lysA	diaminopimelate decarboxylase	4.1.1.20	Label B
	spr1796	-	thiamine pyrophosphokinase	2.7.6.2	Label C
	spr1797	rpe	ribulose-phosphate 3-epimerase	5.1.3.1	Label B
	spr1812	ansB	L-asparaginase	3.5.1.1	Label B
	spr1823	pbp2a	penicillin-binding protein 2A	2.4.1.129	Label D
	spr1825	gapA	glyceraldehyde-3-phosphate dehydrogenase	1.2.1.12	Label B
	spr1833	bgl2	beta-glucosidase	3.2.1.21	Label B
	spr1834	ptcC	PTS system, lactose/cellobiose IIC component family protein	2.7.1.69,4.A.3.1.#_AND_4.A.3.2.#	Label C
	spr1837	adhE	bifunctional acetaldehyde-CoA/alcohol dehydrogenase	1.2.1.10, 1.1.1.1	Label C
	spr1841	tktA	transketolase	2.2.1.1	Label B
	spr1844	araD	L-ribulose-5-phosphate 4-epimerase	5.1.3.4	Label B
	spr1845	sga	L-xylulose 5-phosphate 3-epimerase	5.1.3.22	Label C
	spr1846	ulaD	3-keto-L-gulonate-6-phosphate decarboxylase	4.1.1.85	Label C
	spr1847	PTS-EII	ascorbate-specific phosphotransferase enzyme IIA component	2.7.1.69	Label C
	spr1848	PTS-EII	PTS system, Lactose/Cellobiose specific IIB subunit	2.7.1.69	Label C
	spr1849	ulaA	PTS system ascorbate-specific transporter subunit IIC	2.7.1.69,4.A.7.1.#	Label C
	spr1854	ackA	acetate kinase	2.7.2.1	Label A
	spr1865	-	superoxide dismutase	1.15.1.1	Label C
	spr1866	adh	alcohol dehydrogenase, zinc-containing	1.1.1.1	Label B
	spr1867	nagA	N-acetylglucosamine-6-phosphate deacetylase	3.5.1.25	Label B
	spr1878	thrC	threonine synthase	4.2.3.1	Label B
	spr1882	pgi	glucose-6-phosphate isomerase	5.3.1.9	Label A
	spr1902	gpsA	glycerol-3-phosphate dehydrogenase	1.1.1.94	Label A
	spr1903	galU	UTP-glucose-1-phosphate uridylyltransferase	2.7.7.9	Label B
	spr1906	hipO	amidohydrolase family protein	3.5.1.47	Label C
	spr1907	dapH	2,3,4,5-tetrahydropyridine-2,6-dicarboxylate N-acetyltransferase	2.3.1.89	Label A
	spr1909	pbp1b	penicillin-binding protein 1B	2.4.1.129	Label C
	spr1916	malP	maltodextrin phosphorylase	2.4.1.1	Label B
	spr1935	ilvD	dihydroxy-acid dehydratase	4.2.1.9	Label A
	spr1936	tktC	transketolase, C-terminal domain protein	2.2.1.1	Label C
	spr1937	tktN	transketolase	2.2.1.1	Label C
	spr1938	ulaA	PTS system ascorbate-specific transporter subunit IIC	2.7.1.69,4.A.7.1.#	Label C
	spr1958	arcC	carbamate kinase	2.7.2.2	Label C
	spr1963	adh2	alcohol dehydrogenase	1.1.1.1	Label B
	spr1967	PTS-EII	PTS system mannose/fructose/sorbose IID component family protein	2.7.1.69,4.A.2.1.#_AND_4.A.6.1.#	Label C
	spr1968	PTS-EII	PTS system sorbose-specific iic component family protein	2.7.1.69,4.A.2.1.#_AND_4.A.6.1.#	Label C
	spr1969	PTS-EII	PTS system, IIB component	2.7.1.69	Label C
	spr1973	fcsK	FGGY family of carbohydrate kinase, N-terminal domain protein	2.7.1.5	Label B
	spr1981	dltB	D-alanyl-lipoteichoic acid biosynthesis protein DltB	6.1.1.13	Label C
	spr1988	glpF	glycerol uptake facilitator protein	2.7.1.30	Label F
	spr1989	glpD-truncation	glycerol-3-phosphate dehydrogenase, truncation	1.1.3.21	Label C
	spr1990	glpD-truncation	glycerol-3-phosphate dehydrogenase, truncation	1.1.3.21	Label C
	spr1991	glpK	glycerol kinase	2.7.1.30	Label A
	spr2015	cycK	cysteine synthase A	2.5.1.47	Label B
	spr2027	pgsA	CDP-diacylglycerol--glycerol-3-phosphate 3-phosphatidyltransferase	2.7.8.5	Label B
	spr2033	imdH	inosine-5'-monophosphate dehydrogenase	1.1.1.205	Label B

## Sheet: Table S4
	Gene name	TC Family number
	spr0043	3.A.1.106.#,3.A.1.110.#,3.A.1.112.#,3.A.1.117.#,3.A.1.12.#,3.A.1.135.#
	spr0061	4.A.2.1.#,4.A.6.1.#
	spr0062	4.A.2.1.#,4.A.6.1.#
	spr0106	3.A.1.106.#,3.A.1.110.#,3.A.1.112.#,3.A.1.117.#,3.A.1.12.#,3.A.1.135.#
	spr0137	3.A.1.106.#,3.A.1.110.#,3.A.1.112.#,3.A.1.117.#,3.A.1.12.#,3.A.1.135.#
	spr0231	4.A.3.1.#,4.A.3.2.#
	spr0259	4.A.2.1.#,4.A.6.1.#
	spr0260	4.A.2.1.#,4.A.6.1.#
	spr0282	4.A.3.1.#,4.A.3.2.#
	spr0294	4.A.2.1.#,4.A.6.1.#
	spr0295	4.A.2.1.#,4.A.6.1.#
	spr0421	4.A.3.1.#,4.A.3.2.#
	spr0425	4.A.3.1.#,4.A.3.2.#
	spr0468	3.A.1.106.#,3.A.1.110.#,3.A.1.112.#,3.A.1.117.#,3.A.1.12.#,3.A.1.135.#
	spr0505	4.A.1.2.#
	spr0691	3.A.1.25.#
	spr0749	3.A.1.2.#,3.A.1.4.#
	spr0780	4.A.2.1.#,4.A.6.1.#
	spr0780	4.A.2.1.#
	spr0875	2.A.1.15.#,2.A.1.2.#
	spr0976	3.A.1.2.#,3.A.1.4.#
	spr1023	2.A.1.21.#
	spr1070	4.A.3.1.#,4.A.3.2.#
	spr1112	2.A.87.2.#
	spr1203	3.A.1.106.#,3.A.1.110.#,3.A.1.112.#,3.A.1.117.#,3.A.1.12.#,3.A.1.135.#
	spr1215	3.A.1.106.#,3.A.1.110.#,3.A.1.112.#,3.A.1.117.#,3.A.1.12.#,3.A.1.135.#
	spr1289	3.A.1.106.#,3.A.1.110.#,3.A.1.112.#,3.A.1.117.#,3.A.1.12.#,3.A.1.135.#
	spr1290	3.A.1.106.#,3.A.1.110.#,3.A.1.112.#,3.A.1.117.#,3.A.1.12.#,3.A.1.135.#
	spr1359	3.A.2.1.#,3.B.1.1.#
	spr1360	3.A.2.1.#,3.B.1.1.#
	spr1361	3.A.2.1.#,3.B.1.1.#
	spr1362	3.A.2.1.#,3.B.1.1.#
	spr1363	3.A.2.1.#,3.B.1.1.#
	spr1364	3.A.2.1.#,3.B.1.1.#
	spr1365	3.A.2.1.#,3.B.1.1.#
	spr1366	3.A.2.1.#,3.A.2.2.#,3.B.1.1.#,3.D.4.4.#
	spr1453	2.A.1.32.#,2.A.1.68.#,2.A.1.7.#
	spr1525	3.A.1.1.#
	spr1566	4.A.1.2.#
	spr1656	3.A.1.106.#,3.A.1.110.#,3.A.1.112.#,3.A.1.117.#,3.A.1.12.#,3.A.1.135.#
	spr1656	3.A.1.106.#,3.A.1.110.#,3.A.1.112.#,3.A.1.12.#,3.A.1.135.#
	spr1657	3.A.1.106.#,3.A.1.110.#,3.A.1.112.#,3.A.1.117.#,3.A.1.12.#,3.A.1.135.#
	spr1663	2.A.40.1.#,2.A.40.3.#
	spr1677	3.A.1.106.#,3.A.1.110.#,3.A.1.112.#,3.A.1.12.#
	spr1699	4.A.1.2.#
	spr1780	3.A.2.1.#,3.A.2.2.#,3.B.1.1.#,3.D.4.4.#
	spr1834	4.A.3.1.#,4.A.3.2.#
	spr1849	4.A.7.1.#
	spr1938	4.A.7.1.#
	spr1967	4.A.2.1.#,4.A.6.1.#
	spr1968	4.A.2.1.#,4.A.6.1.#
	spr1981	2.A.50.2.#
	spr1988	1.A.8.10.#,1.A.8.2.#,1.A.8.9.#

## Sheet: Table S5
	Calculation												Validation
	Macromolecule	From	Metabolites	Formula	KEGG ID	Compartment	stoichiometry		mass %	MW	MW Original		mass %		MASS
							mmol M / g MM	mmol M /gDW	gMM / gDW	gM / molM	gM / molM		gM / gMM	gM / gMM	gM / gDW	gMM / gDW
	Cofactors	other	Riboflavin	C17H20N4O6	C00255	cytoplasmic	0.156294	0.00906507	0.058	376.364	376.364		0.0588235	1	0.00341176	0.058		M	molecule (e.g. cofactor, amino acid, nucleotide, etc.)
		Universal	FMN	C17H21N4O9P	C00061	cytoplasmic	0.128902	0.0074763		456.344	456.344		0.0588235		0.00341176			MM	MacroMolecule (e.g. Cofactors, Protein, Nucleotides, etc.)
		Universal	FAD	C27H33N9O15P2	C00016	cytoplasmic	0.074882	0.00434316		785.55	785.55		0.0588235		0.00341176
		Universal	CoA	C21H36N7O16P3S	C00010	cytoplasmic	0.0766396	0.0044451		767.534	767.534		0.0588235		0.00341176
		Universal	Thiamin diphosphate	C12H19N4O7P2S	C00068	cytoplasmic	0.138306	0.00802175		425.314	425.314		0.0588235		0.00341176
		Universal	S-Adenosyl-L-methionine	C15H22N6O5S	C00019	cytoplasmic	0.147636	0.00856286		398.437	398.437		0.0588235		0.00341176
		Universal	NADP+	C21H29N7O17P3	C00006	cytoplasmic	0.07902	0.00458316		744.413	744.413		0.0588235		0.00341176
		Universal	NAD+	C21H28N7O14P2	C00003	cytoplasmic	0.0885319	0.00513485		664.433	664.433		0.0588235		0.00341176
		Universal	Pyridoxal phosphate	C8H10NO6P	C00018	cytoplasmic	0.238015	0.0138049		247.142	247.142		0.0588235		0.00341176
		Universal	Tetrahydrofolate	C19H23N7O6	C00101	cytoplasmic	0.13206	0.0076595		445.429	445.429		0.0588235		0.00341176
		Universal	5-Methyltetrahydrofolate	C20H25N7O6	C00440	cytoplasmic	0.128029	0.00742566		459.456	459.456		0.0588235		0.00341176
		Universal	10-Formyltetrahydrofolate	C20H23N7O7	C00234	cytoplasmic	0.124247	0.00720634		473.439	473.439		0.0588235		0.00341176
		Conditional (medium)	biotin	C10H16N2O3S	C00120	cytoplasmic	0.240774	0.0139649		244.311	244.311		0.0588235		0.00341176
		Conditional (Potter et al., 2012; Shah et al., 2011)	Cadaverine	C5H14N2	C01672	cytoplasmic	0.575696	0.0333904		102.178	102.178		0.0588235		0.00341176
		Conditional (Potter et al., 2012; Shah et al., 2011)	Putrescine	C4H12N2	C00134	cytoplasmic	0.6673	0.0387034		88.1515	88.1515		0.0588235		0.00341176
		Conditional (Potter et al., 2012; Shah et al., 2011)	Spermidine	C7H19N3	C00315	cytoplasmic	0.404993	0.0234896		145.246	145.246		0.0588235		0.00341176
		Conditional (Potter et al., 2012; Shah et al., 2011)	Spermine	C10H26N4	C00750	cytoplasmic	0.290716	0.0168615		202.34	202.34		0.0588235		0.00341176
	Cell wall	Table S6	[GlcNAc-(1->4)-Mur2Ac(oyl-L-Ala-g-D-Glu-L-Lys-D-Ala-D-Ala)]n-diphosphoundecaprenol	C94H156N8O26P2(C39H64N8O19)n-1	C11826	cytoplasmic	0.331782	0.0862634	0.26	2825.19	2825.19		0.937348	1	0.24371	0.26
			Teichoic Acid		C06707	cytoplasmic	0.305929	0.0795416		204.794	204.794		0.0626524		0.0162896
	e-RNA	tool	ATP	C10H16N5O13P3	C00002	cytoplasmic	0.806582	0.032541	0.0403443	329.206	329.206		0.265532	1	0.0107127	0.0403442
			CTP	C9H16N3O14P3	C00063	cytoplasmic	0.65008	0.026227		305.181	483.156		0.198392		0.00800399
			GTP	C10H16N5O14P3	C00044	cytoplasmic	0.931858	0.0375951		345.205	523.18		0.321682		0.012978
			UTP	C9H15N2O15P3	C00075	cytoplasmic	0.700254	0.0282512		306.166	484.141		0.214394		0.00864956
	e-DNA		dATP	C10H16N5O12P3	C00131	cytoplasmic	0.976968	0.0084724	0.00867213	313.206	491.182		0.305993	1	0.00265361	0.00867213
			dCTP	C9H16N3O13P3	C00458	cytoplasmic	0.640924	0.00555818		289.182	467.157		0.185344		0.00160732
			dGTP	C10H16N5O13P3	C00286	cytoplasmic	0.644703	0.00559095		329.206	507.181		0.21224		0.00184057
			dTTP	C10H17N2O14P3	C00459	cytoplasmic	0.974458	0.00845063		304.193	482.168		0.296423		0.00257062
	Lipoteichoic acid	Table S7	Glycerol	C3H8O3	C00116	cytoplasmic	0.179153	0.00540395	0.0302	92.0938	92.0938		0.0164988	1	0.00049767	0.0301639
			Choline phosphate	C5H15NO4P	C00588	cytoplasmic	1.07492	0.0324237		184.151	184.151		0.197946		0.00597084
			Fatty acid	C3H5O2R	C00162	cytoplasmic	0.358305	0.0108079		282.341	282.341		0.101164		0.00305152
			N-Acetyl-D-galactosamine	C8H15NO6	C01132	cytoplasmic	1.61237	0.0486355		221.208	221.208		0.35667		0.0107586
			D-Ribitol 5-phosphate	C5H13O8P	C01068	cytoplasmic	0.71661	0.0216158		232.126	232.126		0.166344		0.00501758
			alpha-D-Glucose	C6H12O6	C00267	cytoplasmic	0.895763	0.0270197		180.156	180.156		0.161377		0.00486777
	Lipid	Table S9	Diglucosyl-diacylglycerol	C17H26O15R2	C06040	cytoplasmic	0.301192	0.00386119	0.0128	888.92	888.92		0.267736	1	0.00343229	0.0128197
			Cardiolipin	C13H18O17P2R4	C05980	cytoplasmic	0.422465	0.00541586		1345.3	1345.3		0.568343		0.00728597
			Phosphatidylglycerol	C8H13O10PR2	C00344	cytoplasmic	0.187872	0.00240846		718.698	718.698		0.135024		0.00173096
			3-D-Glucosyl-1,2-diacylglycerol	C11H16O10R2	C04046	cytoplasmic	0.0397614	0.000509728		726.78	726.78		0.0288978		0.00037046
	Protein	tool	Glycine	C2H5NO2	C00037	cytoplasmic	0.585957	0.345715	0.59	57.0514	75.0666		0.0334297	1	0.0197235	0.590001
			L-Alanine	C3H7NO2	C00041	cytoplasmic	0.651005	0.384093		71.078	89.0932		0.0462721		0.0273006
			L-Arginine	C6H14N4O2	C00062	cytoplasmic	0.365617	0.215714		156.186	174.201		0.0571042		0.0336915
			L-Asparagine	C4H8N2O3	C00152	cytoplasmic	0.39308	0.231917		114.103	132.118		0.0448515		0.0264624
			L-Aspartate	C4H7NO4	C00049	cytoplasmic	0.489156	0.288602		115.088	133.103		0.0562958		0.0332145
			L-Cysteine	C3H7NO2S	C00097	cytoplasmic	0.05402	0.0318718		103.143	121.158		0.00557179		0.00328736
			L-Glutamate	C5H9NO4	C00025	cytoplasmic	0.645537	0.380867		129.114	147.129		0.0833479		0.0491752
			L-Glutamine	C5H10N2O3	C00064	cytoplasmic	0.362082	0.213629		128.129	146.144		0.0463934		0.0273721
			L-Histidine	C6H9N3O2	C00135	cytoplasmic	0.171622	0.101257		137.139	155.155		0.0235362		0.0138864
			L-Isoleucine	C6H13NO2	C00407	cytoplasmic	0.648241	0.382462		113.158	131.173		0.0733534		0.0432785
			L-Leucine	C6H13NO2	C00123	cytoplasmic	0.911301	0.537668		113.158	131.173		0.103121		0.0608412
			L-Lysine	C6H14N2O2	C00047	cytoplasmic	0.612197	0.361196		128.172	146.188		0.0784668		0.0462954
			L-Methionine	C5H11NO2S	C00073	cytoplasmic	0.223467	0.131846		131.196	149.211		0.029318		0.0172976
			L-Phenylalanine	C9H11NO2	C00079	cytoplasmic	0.414894	0.244787		147.174	165.189		0.0610616		0.0360263
			L-Proline	C5H9NO2	C00148	cytoplasmic	0.29424	0.173602		97.1153	115.13		0.0285752		0.0168594
			L-Serine	C3H7NO3	C00065	cytoplasmic	0.55292	0.326223		87.0774	105.093		0.0481468		0.0284066
			L-Threonine	C4H9NO3	C00188	cytoplasmic	0.483356	0.28518		101.104	119.119		0.0488692		0.0288328
			L-Tryptophan	C11H12N2O2	C00078	cytoplasmic	0.0827673	0.0488327		186.21	204.225		0.0154121		0.00909314
			L-Tyrosine	C9H11NO3	C00082	cytoplasmic	0.340465	0.200875		163.173	181.189		0.0555548		0.0327774
			L-Valine	C5H11NO2	C00183	cytoplasmic	0.618572	0.364957		99.1311	117.146		0.0613197		0.0361786
															1	1	Total

## Sheet: Table S6
	Bui et al 2012 (TA 40-50% of cell wall)
	cell wall composition
	Macromolecules		ids	g MM / g Cell Wall	g MM / mol Cell Wall	mmol MM /g Cell Wall	molar fraction (wt/other) MM/cell_wall
	Teichoic Acid		C06707	0.45	0.215874	2.19733	0.918613
	[GlcNAc-(1->4)-Mur2Ac(oyl-L-Ala-g-D-Glu-L-Lys-D-Ala-D-Ala)]n-diphosphoundecaprenol	C94H156N8O26P2(C39H64N8O19)n-1	C11826	0.55	0.0622607	0.194677	0.0813865
				1	0.278135	2.39201
	Fischer 1997		ids	molar fraction	molM / mol MM	MW (mol M / g M)	g M / mol MM
	Teichoic acid		C06707
	Choline phosphate	C5H15NO4P	C00588	0.65	0.323383	184.151	59.5512
	N-Acetyl-D-galactosamine	C8H15NO6	C01132	0.7	0.348259	221.208	77.0375
	D-Ribitol 5-phosphate	C5H13O8P	C01068	0.35	0.174129	232.126	40.4199
	alpha-D-Glucose	C6H12O6	C00267	0.31	0.154229	180.156	27.7852
	Total			2.01	1		204.794
	Mosser and Tomasz, 1970		Table III
			molar ratios	micromole/ mg	% weigth
	Teichoic Acid	ribitol phosphate
		N-acetyl-D-galactosamine	1	0.52	0.105
		phosphorus	1.65	0.86	0.082
		choline	0.9	0.47	0.048
		glucose
	peptidoglycan	glucosamine	0.4	0.21	0.042
		muramic acid	0.4	0.21	0.068
		muramic acid phosphate	0.08	0.04	0.017
		lysine	0.62	0.32	0.042
		alanine	1.52	0.79	0.056
		glutamate	0.83	0.43	0.055
	additional aminoacids	aspartate	0.37
		serine	0.21
		glycine	0.4
		threonine	0.21

## Sheet: Table S7
	Behr et al 1992
	Model
	Lipoteichoic acid	C92H201O140P25Acyl2	C06042	molar fraction	molM / mol MM	MW (gl M / mol M)	g M / mol MM	mmol M / g MM	mmol M / g DW
	Glycerol	C3H8O3	C00116	0.1	0.037037	92.0938	3.41088	0.179153	0.0164245
	Choline phosphate	C5H15NO4P	C00588	0.6	0.222222	184.151	40.9224	1.07492	0.098547
	Fatty acid	C3H5O2Acyl	C00162	0.2	0.0740741	282.341	20.9142	0.358305	0.032849
	N-Acetyl-D-galactosamine	C8H15NO6	C01132	0.9	0.333333	221.208	73.7359	1.61237	0.147821
	D-Ribitol 5-phosphate	C5H13O8P	C01068	0.4	0.148148	232.126	34.389	0.71661	0.065698
	alpha-D-Glucose	C6H12O6	C00267	0.5	0.185185	180.156	33.3622	0.895763
	Total			2.7	1		206.735

## Sheet: Table S8
	Behr et al 1992
	fatty acids	kegg ids	min	max	average	molar %	model
	C12:0	C05223	2.9	8.2	5.55	0.0549233	0.0549233
	C14:0	C05761	7.8	14.2	11	0.108857	0.108857
	Delta7-C16:1	C05063	2.8	4.9	3.85	0.0381	0.192974
	Delta9-C16:1		12.7	18.6	15.65	0.154874
	C16:0	C05064	47.5	49.3	48.4	0.478971	0.478971
	Delta9-C18:1	C16221	2.5	4.1	3.3	0.0326571	0.115289
	Delta11-C18:1		6	10.7	8.35	0.0826324
	C18:0	C04088	3.3	6.6	4.95	0.0489857	0.0489857
	Total	-			101.05	1	1

## Sheet: Table S9
	Lipid	L. lactis					S. penumoniae R6
	Compound	molM / mol MM	MW (mol M / g M)	g M / mol MM	mmol M / g MM	mmol M / g DW	molM / mol MM	MW (mol M / g M)	g M / mol MM	mmol M / g MM	mmol M / g DW
	Diglucosyl-diacylglycerol	0.303	754.3	228.553	0.281756	0.00957969	0.316614	888.92	281.445	0.301192	0.0117355
	Cardiolipin	0.425	1413.6	600.78	0.395202	0.0134369	0.444096	1345.3	597.444	0.422465	0.0164607
	Phosphatidylglycerol	0.189	500.2	94.5378	0.175749	0.00597545	0.197492	718.698	141.937	0.187872	0.00732017
	3-D-Glucosyl-1,2-diacylglycerol	0.04	924.3	36.972	0.0371955	0.00126465	0.0417973	726.78	30.3774	0.0397614	0.00154924
	lysophosphatidylglycerol	0.043	762.3	32.7789	0.0399851	0.00135949	--	--	--	--	--
	Total	1		993.622			1		1051.2
			from elemental composition	1075.4

[truncated: 6 more sheets: Table S10, Table S11, Table S12, Table S13, Table S14, Table S15]
